# Supplementary material for: Homonegativity as a barrier to HIV testing intention: A qualitative study of Asian American Men Who Have Sex with Men
Source: Research Square preprint supplement (doi:10.21203/rs.3.rs-6580037/v1), 2025-09-23
Supplement: Supplementary file 1 [file 4e0a503e2cdc424b12eaf577.docx]

**FOCUS GROUP DISCUSSION GUIDE**

# PRE-DISCUSSION PREPARATION AND INTRODUCTION

**Key:**

*Red Italics* – Do not read aloud.

**Materials:**

- Tape recorder (1)
- A moderator and a note-taker
- Amazon gift-cards ready for incentive reimbursement

*(Read the following introduction after all participants have joined the room for the discussion group. Ensure that all participants are comfortable in their place).*

Good morning/afternoon. My name is ___________, and I am part of the CPACS (Center for Pan Asian Community Services) and Emory University ’s study about HIV testing among Asian American men who have sex with men (MSM). First, I want to thank you all for taking the time to be with us today.

Before we begin, I’d like to explain what a focus group is and then give you some information about this specific focus group. As some of you probably already know, a focus group is like a discussion group. In a focus group, people are asked to discuss their thoughts and ideas about a subject. I’ll introduce a subject by asking the group a question. There are no right or wrong answers to the questions. What I am looking for is an informal discussion about how people think or feel. I encourage you to just jump into the conversation with how you feel about the subject I bring up or about other people’s responses. Just like there is no right or wrong response, there is also no single opinion for any subject. I am interested in hearing what each of you think and feel about each topic. The more points of view, the better. I’d like to make each of you aware that our discussion today will be audio recorded to ensure that I accurately capture the discussion. Information from this discussion will be kept confidential and will only be accessed by authorized personnel at Emory. Explanations on the use of information were provided in the consent form that you reviewed prior to this meeting. This study is entirely voluntary. For your involvement, you will be compensated with a $30 gift card. The incentive will be handed to you after the discussion has ended.

*Wait few seconds for all focus group members to ask questions, if any. After all members have settled, continue with the ground rules.*

In order for this group to be as engaging as possible for everyone, there are a few “ground rules” I am hoping we can all agree to before we get started *(start reviewing ground rules)*

1. Turn off your cell phones during the discussion.
2. Please try to protect each other’s confidentiality (feel free to share what you heard here but don’t link it back to someone here specifically). Some of you may know each other. If you do, please respect each other’s privacy and confidentiality by not mentioning each other’s presence in the group to other people. Everyone participating in this group is sharing important information of their views around HIV testing and it is critically important that people respect each other’s decisions to share and to keep this information private from others. So, please do not share information other people share today with anyone outside of this room.
3. Please respect each other and each other’s opinions. There is no incorrect way to feel or think here and we want to encourage everyone to have the opportunity to share.
4. Finally, please try to speak one at a time, so we can listen what other colleagues have to say. This will also make it easier to transcribe our discussions accurately.
5. If you get disconnected during the focus group for any reason, please try to log in so we can have as much as of your participation into the discussion.

*Ask participants if there are any other rules that they believe are missing (or they would like to add). Repeat suggested rules as the group agrees on to the list.*

Are there any questions or concerns about these ground-rules? *(take some time for each participant to confirm that they agree to these group rules)*

Before we start recording, I would like to make sure you all have read and agreed to the consent form that had been emailed to you prior to this meeting. Please let me know NOW if you have any questions or concerns before we move on. *(take some time for each participant to confirm that they agree to the consent form)*

Ok, let’s begin by getting to know a little about each other.

**[WARM-UP]** [5 minutes]

First, introduce yourself (first names or **nickname**) and something about yourself (e.g. your occupation, how long you’ve been living in Atlanta or Georgia, etc.)

Great. Let’s begin **recording.** *(Turn on Zoom recording and the external recording device)*

The overall subject of our conversation today will be about HIV testing among Asian American men who have sex with men (MSM). In the next 60 minutes, I will use a list of questions to guide our discussion.

# QUESTIONS AND PROBES

**Q1. [attitude] Tell me what you know about HIV testing?**

⇒PROBE:

- In general, what do you think about HIV testing?
- How serious is HIV?
- How important is it for people to get tested for HIV?
- How important is it for Asian MSM to get tested?
- Do you have positive or negative feelings about getting an HIV test?
- What do you think **are** the benefits of having an HIV test?
- In general, how often should people get tested for HIV – please explain?

**Q2. [perceived behavioral control] Would it be easy or difficult for you to get tested for HIV?**

⇒PROBE:

- How easy is it for you to get an HIV test?
  - If it is easy, what makes it so?
  - If it is not, what makes it hard/difficult?
- What might be the facilitators for you to get an HIV test?
- What might be the barriers for you to get an HIV test?
- How confident are you with getting a HIV test in the future? Please explain.

**Q3. [subjective norm] When you talk about your intention to get HIV tested with people you trust (for example: friends, sexual partners, health care professionals, etc.), how do they react to that? Please describe.**

⇒PROBE:

- Who do you talk to about HIV testing most often?
- What do you discuss?
- Do you find the conversation supportive, easy-going, or taboo-like, etc.? Please tell us more about that.
- What groups approve of you getting tested for HIV?
- What groups disapprove?
- To whom would you turn to for advice regarding HIV testing?

**Q4. [homonegativity and intention for HIV testing] If you intend to get a HIV test, what are some of the experiences or stigma you might have because of your sexual identity as an Asian American MSM?**

⇒PROBE:

- What are the physical or emotional reactions from others to your sexual identity as it comes to HIV testing?
  - How do those experiences positively or negatively influence your intention to HIV testing?
- In what ways do your own feelings of being Asian MSM affect your intention to get tested for HIV?

**Q5. [social norm] What do you know about HIV testing behavior of other Asian MSM?**

⇒PROBE:

- How does that affect your intention to get tested?
- How does peer or social pressure influence your intention to get tested for HIV?

**Q6. [perceived HIV risk] What risk behaviors would influence your intention to get tested for HIV?**

⇒PROBE:

- How do those behaviors affect your intention to get tested for HIV?
- What other factors might influence your intention to get an HIV test?
- Are there certain individuals who should be more concerned about HIV than others – if yes, why?
- What would make them decide to get an HIV test?

**[WIND DOWN/WRAP UP**] [5 minutes]

-----TIME PERMITTING----

**Q7. What strategies could help Asian MSM increase their use of HIV testing services? What ideas do you have?**

**Wrap up: Is there anything you might want to add to this conversation before we adjourn?**

[**ACKNOWLEDGEMENTS**] Thank you very much for coming today. We appreciate your thoughts and ideas. They will be very helpful to our study.

# FILL OUT BIOGRAPHICAL QUESTIONAIRE & HAND OUT INCENTIVES
