# Supplementary material for: Homonegativity as a barrier to HIV testing intention: A qualitative study of Asian American Men Who Have Sex with Men
Source: Research Square preprint supplement (doi:10.21203/rs.3.rs-6580037/v1), 2025-09-23
Supplement: Supplementary file 2 [file b0fda27aaa018326479f67b0.docx]

**Table 1. Themes and sample responses characterized by saliency**

| **Construct** | **Themes** | **Salience** | | | **Sample responses** |
| --- | --- | --- | --- | --- | --- |
| **Group 1** | **Group 2** | **Group 3** |
| 1. **Social Norms about HIV testing** | 1.1 Underuse of HIV testing in the general Asian American population | X | X | X | *“So other Asians I feel most of them, they're so reluctant to go for the tests, because they feel that they will face some stigma.* *And they feel that they come from that minority group.”*  *“I don’t see they really openly discuss this topic [HIV testing].”*  *“Yeah, most of them are not comfortable [getting tested].”*  *“I think most of them do not want to go for the tests because of being Asians.”* |
| 1.2 HIV testing is common among Asian American MSM | X | X | X | *“I guess getting tested for me and getting continually tested would be a way for me to bolster my community.”*  *“I'm pretty sure that they [Asian American MSM] have had some done in the past and maybe the fact that, you know, one of them gets COVID tests pretty regularly tells me that he generally wants to know his status for anything risky that he might under undergo.”*  *“So aside from that, I think it's, at least within my community and social circle, it's, it's a positive action to get HIV testing.”*  *“There is a handful of very close friends of mine who have discussed this with me. For some reason they mention they're going to get tested or whatever.”* |
| 1.3 Peer Influence promoting HIV testing | X | X | X | *“That's a very interesting comment B, because it does remind me that some people, some of my friends actually go get testing together and that has helped them.”*  *“Yeah, I feel very confident getting it and if my peers are getting tested then why not?”*  *“I don't think there's any issues at all, with my immediate friends around this topic at all.”*  *“Well, so I think a lot of my friends, gay Asians or Caucasians or whatever, it [getting HIV tested] doesn't matter.”* |
| 1.4 Negative social norms as potential barrier to HIV testing | X | X |  | “*As for me, I think the testing behavior of those who are surrounding me, I have come to find out that these guys are a little bit shy and reluctant to go to testing as suggested, because I've never had maybe some in a group discussing about maybe testing for HIV and AIDS*”.  *“And then being pointed that they are, for example, if they're positive, and so people laugh at them, and they will also isolate them.”* |
| 1. **Homonegativity** | 2.1 Experiencing homonegativity is a barrier to HIV testing among Asian American MSM | X | X | X | *“Most of them really are scared but lack the confidence to get on get tested because of all the stereotypes in the community and the society today.”*  *“I don't know why, maybe it's fear, maybe it's a stigma. I don't know. I don't know. Because that's not something [HIV testing] we talk about it.”*  *“Not everyone gets an HIV test, and getting one is a sign [of being homosexual], especially if you're not out to a lot of people. It is very--that was one of my considerations.”* |
| 2.2 Homonegativity places greater burden on HIV testing for the first-time testers |  | X | X | *“Kind of like double minority in which you are an Asian and then you're always a member of the marginalized community as well. So that might be a barrier in the first time or somewhat considered--I don't know.”*  *“But with those who really care about how people, how society looks at them, or how people think about them or so and so then that might be a problem and that might be a barrier [in the first time] right there.”*  “*It was very difficult decision the first time I went. When I was further from my family, it was easier*”. |
| 2.3 Divergence in Asian sub-cultures | X | X |  | *“Now, I think that is an ultimately, that the degree of out-ness is where it intersects with a lot of things like, ethnicity, religion, and I think the diversity of the Asian American experience kind of gets to that in that, you know, that many people come from different religions and ethnic backgrounds.”*  *“But I do know, it's a lot harder for other people, especially those who don't have as much familial support or those who just don't have as many resources and accessibility as us. So, I think about that, and I think it's a particularly a South Asian experience.”* |
| 2.4 Difference by other demographic characteristics (education, immigration status) | X | X |  | *“And with all that taboo, and the association, I thought that was kind of--I didn't, I wasn't mad, because I know that was lack of education.”*  *“So, I think they kind of tie being gay and AIDS hand in hand and there's a lot of conversation, but that is from first generation immigrant escaping war, right?”* |
| 1. **Perceived HIV Risk** | 3.1 Risks from having multiple partners | X | X | X | *“That people who have sex more frequently, those people who have multiple partners, those people maybe who are not loyal to their partners should be very much concerned, because their behavior may trigger them to get infected with the virus more than, let's say, guys who have maybe one partner, guys who more loyal to their partners.”*  *“It doesn't have to be unprotected but this engagement activity, sexual activity with other partners prior to the current one.”*  *“Especially if it's part of the most vulnerable period where they're, embracing their newfound freedom, getting time away from family, and parents or they are possibly more likely to engage in those behaviors [having multiple partners], especially with college parties.”*  *“And it's just a whole bunch of high, half-naked people dancing on each other.”* |
| 3.2 Risks from a heightened frequency of sexual activities | X | X | X | *“The frequency of sex and also the number of partners. So those are factors.”*  *“I think to me, those who regularly have sex, the age bracket especially between 18 to 30, I will say that their sex activities are much active.”*  *“That people who have sex more frequently, … should be very much concerned”* |
| 3.3 Risks from unprotected sexual intercourses | X |  | X | *“Okay, to me is having, let's say, unprotected sex with more than one person.”*  *“Definitely unprotected sex and sexual encounters where maybe you don't know the partners at all.”* |
| 1. **Attitude about HIV testing** | 4.1 Health benefits of HIV testing (mitigating uncertainty, navigating health care) | X | X | X | *“So, getting tested for HIV can give you a peace of mind.”*  *“Okay, my main point is that it is important to do HIV testing to free yourself from stress.”*  *“It is always better to take action than ignore your concern.”*  *“Yeah, that was a really good point. I'd say yeah, like, just the health benefits is just too many health benefits to even considering not getting one, not only for yourself to make sure that on the chance that you do, gosh, you ever do receive HIV that it's important to, to find out immediately and then just take care as soon as possible to manage the viral load.”* |
| 4.2 Seeking HIV testing helps normalize the topic in public | X | X |  | *“I think, yeah socially, it's a good benefit for more people to take it more often, you know, have people talk about it, because then the taboo becomes less and less, you know.”*  *“And that's something we really want to sort of mention and be known to the public that testing is actually a good thing, even if it's positive, there are a lot of drugs out there that helps you survive much better.”* |
| 4.3 Confidentiality as a concern relating to HIV testing |  | X | X | “*How many people will know about what your sexual activities and yeah, like it just something you want to keep very close to the chest*. *I'd say the costs, again, it's like, then you've got to weigh the social costs.*”.  “*Yeah, because I don't--with my primary care provider, I am not I’m open about it and I think partly because that primary care provider is connected with like, it's also a provider to my family members. And so, I cannot, I don't even want to think about that*”.  *“I think, I think building off of that, there was something that was mentioned, it's really important and what's making me reflect on what was the biggest challenge for me in accessibility was to keep distance from my family.”* |
| 1. **Subjective Norms about HIV testing** | 5.1 Strong approval from/sharing with non-family (partners, peers, health care providers) | X | X | X | *“Don't know about the other Asian MSM but to me and my partner we took that responsibility to go getting tested after every six months.”*  *“To me, I only share my sexual information [related to HIV testing] with my partner, since I'm not comfortable sharing all that with my other family members.”*  *“I guess if I feel like I need to get testing, I will definitely consult with my partner. So, that's obvious he would support me in this decision.”*  *“So, I think I would just lean on people who are on the need-to-know basis, and that's basically my sexual partner, and the physician.”*  *“I personally will be comfortable sharing with my close trusted friend who will not judge me in case of anything and my physician who will let me know the way forward and how to do everything after knowing my status. Yeah, since it's a private issue.”* |
| 5.2 Lack of support from family | X |  | X | *“Some of the Asian American MSMs that I know, who are, like, completely cut off from their family have--it's like a non-issue.”*  *“There's a barrier when talking about HIV and AIDS to family and they are talking instead to a friend because chatting to your friend is much easier than your family.”*  *“Besides, that, there are some family members who I would not share with just the fact that the get a negative connotation with it or it's taboo.”* |
| 1. **Perceived Behavioral Control about HIV testing** | 6.1 Affordability, availability, and accessibility of HIV testing | X | X | X | *“But I know that it's easily available for me, because it's covered through my health insurance.”*  *“In my case, I have cancer. The hospital I go for treatment. I can get free testing.”*  *“I also know that at pride events, the festivals, there's always testing freely available--free--to anyone to come in and take the test and these tests are--you get results within five to 10 minutes now.”*  *“There's a lot of organizations that does it for free and it's quite fast to know your results.”*  *“Okay for me, I think HIV testing has become quite easy nowadays because awareness, has been done, and there are a lot of self test kits, dispersed available, thanks to the CDC and many other organizations.”* |
| 6.2 Home testing |  | X | X | *“And I have friends who would rather go to me, so that I can do the home test on them, than to go to a professional.”*  *“So outside of, you know, certain people relying on my result, to make them feel a little better I used to have a lot of home testing kits with me.”* |
